# Supplementary material for: Dual Transcriptomics To Determine Gamma Interferon-Independent Host Response to Intestinal Cryptosporidium parvum Infection
Source: Infect Immun. 2022 Feb 17;90(2):e00638-21. doi: 10.1128/iai.00638-21 (PMC8852703; doi:10.1128/iai.00638-21)
Supplement: Supplemental file 1 — Supplemental material. Download iai.00638-21-s0001.csv, CSV file, 0.001 MB [file iai.00638-21-s0001.csv]

Gene_ID	baseMean	F19-ILEUM_S14-Infected-STAg	F20-ILEUM_S16-Infected-STAg	F21-ILEUM_S18-Infected-STAg	F22-ILEUM_S20-Infected-PBS	F23-ILEUM_S22-Infected-PBS	F24-ILEUM_S24-Infected-PBS	log2FoldChange	lfcSE	stat	pvalue	padj
2310069B03Rik_1	21.09544258	0	0	75.5	0	0	0	19.54430842	4.073428296	4.797999866	1.60E-06	0.001192756
Adamts5	52.24167708	22	20	22	125	177	12	-2.217265989	0.613609999	-3.613477605	0.000302117	0.034837122
Ccl4	36.88682493	20	26	3	59	89	59	-2.248478369	0.497764565	-4.517152341	6.27E-06	0.0029322
Dmkn	68.78292656	15	13	22	209	212	22	-3.395602996	0.94258628	-3.602432019	0.000315254	0.03511542
Gzmk	36.72225396	9	16	6	64	75	51	-2.698378552	0.418465587	-6.448268718	1.13E-10	6.17E-07
H19	54.91849911	41	13	18	160	160	73	-2.518424553	0.642665243	-3.918719087	8.90E-05	0.018450968
Il10	16.3630687	10	9	8	28	66	30	-2.247991992	0.539497996	-4.166821763	3.09E-05	0.010115065
Krt14	20.29695192	4	5	2	57	144	5	-3.849187486	0.988413857	-3.894307491	9.85E-05	0.019427783
LOC108167399	14.73831302	2	12	6	54	33	18	-2.429846251	0.659999803	-3.681586326	0.000231787	0.030362279
Mybpc2	56.73416815	29	31.81	25	190.76	150.22	26.45	-2.062544632	0.550692348	-3.745366428	0.000180131	0.028635529
Nr0b2	26.04518834	60	10	19	2	3	4	3.136888443	0.775128067	4.046929246	5.19E-05	0.014285108
Ptger3	74.34797004	40	26	25	160	263	17	-2.207040482	0.634924075	-3.476069923	0.00050882	0.043849538
Rnd1	60.47867311	17	35	25	179	203	38	-2.399076745	0.592036048	-4.052247754	5.07E-05	0.014285108
