# Supplementary material for: Dual Transcriptomics To Determine Gamma Interferon-Independent Host Response to Intestinal Cryptosporidium parvum Infection
Source: Infect Immun. 2022 Feb 17;90(2):e00638-21. doi: 10.1128/iai.00638-21 (PMC8852703; doi:10.1128/iai.00638-21)
Supplement: Supplemental file 5 — Supplemental material. Download iai.00638-21-s0005.csv, CSV file, 0.001 MB [file iai.00638-21-s0005.csv]

Gene_ID	baseMean	F13-CECUM_S1-Uninfected-PBS	F14-CECUM_S3-Uninfected-PBS	F15-CECUM_S5-Uninfected-PBS	F16-CECUM_S7-Uninfected-STAg	F17-CECUM_S9-Uninfected-STAg	F18-CECUM_S11-Uninfected-STAg	log2FoldChange	lfcSE	stat	pvalue	padj
Cma2	57.82206034	21	21	17.87	121.39	71.92	91.35	2.452919256	0.530974718	4.619653576	3.84E-06	0.026428826
Gm44504	162.0315461	93.22	232.82	219.14	10.76	12.38	5.39	-3.992990012	0.552944104	-7.221326686	5.15E-13	1.42E-08
Rims2	139.7296544	289	326	175	11	30	13	-3.743438979	0.562294819	-6.657431032	2.79E-11	3.83E-07
