# Supplementary material for: Dual Transcriptomics To Determine Gamma Interferon-Independent Host Response to Intestinal Cryptosporidium parvum Infection
Source: Infect Immun. 2022 Feb 17;90(2):e00638-21. doi: 10.1128/iai.00638-21 (PMC8852703; doi:10.1128/iai.00638-21)
Supplement: Supplemental file 6 — Supplemental material. Download iai.00638-21-s0006.csv, CSV file, 0.01 MB [file iai.00638-21-s0006.csv]

Gene_ID	baseMean	F16-ILEUM_S8-Uninfected-STAg	F17-ILEUM_S10-Uninfected-STAg	F18-ILEUM_S12-Uninfected-STAg	F19-ILEUM_S14-Infected-STAg	F20-ILEUM_S16-Infected-STAg	F21-ILEUM_S18-Infected-STAg	log2FoldChange	lfcSE	stat	pvalue	padj
3930402G23Rik	50.71220528	24	12	18	104	82	93	2.417802464	0.384171162	6.293555332	3.10E-10	1.17E-07
Acaa1b	82.38283016	140.02	140.58	103.08	29.36	15	12.08	-2.661871151	0.439512071	-6.056423304	1.39E-09	4.43E-07
Acsm5	19.56427042	17	38	23	7	3	5	-2.338364467	0.797955728	-2.930443865	0.003384781	0.036336564
Ak4	947.5981965	600	267	172	1795	1358	950	2.049427901	0.656188746	3.123229274	0.001788783	0.023708756
Alas2	45.87403273	9	20	7	30	86.96	49	2.273679081	0.580078002	3.919609215	8.87E-05	0.002846579
Apol9a	3109.072264	600.69	615.81	1393.14	8340.87	5719.74	4186.04	2.790083033	0.55039566	5.069231529	3.99E-07	4.41E-05
Apol9b	1154.346261	125.31	214.19	481.86	3594.13	1905.26	1476.96	3.011395497	0.697095332	4.319919185	1.56E-05	0.000828758
AW011738	135.472936	35	58	53	389	245	242	2.605252438	0.301372637	8.644621695	5.40E-18	1.59E-14
Bst2	1206.481134	329	236	288	3313	2463	2080	3.244233787	0.632203379	5.13162994	2.87E-07	3.58E-05
Ccrl2	93.50567385	43	40	51	248	175	118	2.023521283	0.302371431	6.692170871	2.20E-11	1.21E-08
Cd274	706.3094725	175	182	310	1909	1603	735	2.67660171	0.339964983	7.873168843	3.46E-15	5.09E-12
Cmpk2	3651.343679	1448	1850	2076	9645	7223	4765	2.018883305	0.299082343	6.750259092	1.48E-11	8.70E-09
Cxcl1	13.16385891	4	1	6	12	28	18	2.468332362	0.733494796	3.365166837	0.000764974	0.013234348
Cyp11b1	25.41388729	9.01	6	11	38	50	49.94	2.478114892	0.550982569	4.497628474	6.87E-06	0.000427803
Cyp1a1	13.76288697	3	20	29	6	1	1	-2.742737513	0.920785017	-2.978694769	0.00289479	0.032579745
Cyp3a25	1680.412498	3011.83	2961.85	2504.94	547.85	721.93	620.98	-2.115041507	0.569132464	-3.716255251	0.000202197	0.005313721
Cyp3a44	159.6876529	311	175	285	41	46	26	-2.660732863	0.668670302	-3.979140174	6.92E-05	0.002404585
Ddx60	4532.224728	1559	1614	2126	14848	7677	6475	2.452932091	0.623101513	3.936649227	8.26E-05	0.002720544
Dhx58	1000.530084	263.99	246	403	3026	1976	1403	2.818476179	0.515136954	5.471314293	4.47E-08	8.06E-06
Dio1	1752.196329	2914	2564	2272	448	736	342	-2.29279672	0.726660645	-3.155250989	0.001603601	0.022168309
Dmp1	15.98083492	4	5	7	38	20	41	2.682775256	0.735022952	3.649920385	0.000262322	0.006423973
Dppa3	16.90865408	11	3	9	18	32	36	2.003157834	0.694361203	2.884893086	0.003915466	0.040035918
Fbp1	719.1256296	883	1325	860	105	155	71	-3.179585418	0.780233774	-4.075170189	4.60E-05	0.001806633
Fosl1	13.2299321	2.78	0	4.62	26.07	20.98	19.67	3.114003316	1.020750971	3.050698363	0.002283098	0.027994076
G6pc	2341.364293	3228	4353	4264	206	422	135	-3.927900246	0.990615849	-3.965109431	7.34E-05	0.002513796
Gbp3	707.4803899	340.94	282.67	245.91	2049.22	1134.67	1180.64	2.36574175	0.326392147	7.24815768	4.22E-13	3.11E-10
Gbp7	741.8779437	403	308	348	2054.33	1232	918	2.010905901	0.337917221	5.950883171	2.67E-09	7.61E-07
Gm10804	8.113743942	2	6	3	14	22	8	2.30837489	0.771932711	2.990383564	0.002786273	0.03201046
Gm12185	11.21522568	0	9.11	0	25.99	24.27	12.09	2.78042778	0.85270617	3.260710287	0.001111335	0.017281899
Gm12250	334.7369072	67.5	39	79.5	1139	661.5	541	3.667626866	0.716879178	5.11610182	3.12E-07	3.73E-05
Gm12250_1	334.7369072	67.5	39	79.5	1139	661.5	541	3.667626866	0.716879178	5.11610182	3.12E-07	3.73E-05
Gm14137	674.4966169	338	218	307	1813	1262	888	2.228677938	0.305211235	7.302083546	2.83E-13	2.18E-10
Gm20559	2549.834318	702	1011	1430	5892	3955	3125	2.037123187	0.268866464	7.576709838	3.54E-14	3.69E-11
Gm30262	20.86026108	6	1	8	42	25	42	2.965839508	0.764209703	3.880923645	0.000104061	0.00319426
Gm30311	15.38452505	7	4	1	49	26	50	3.732682562	0.875277373	4.264571068	2.00E-05	0.000991952
Gm30352	10.28168832	6	4	2	10	23	6	2.413822367	0.769544262	3.136690749	0.001708662	0.023026571
Gm31624	134.2836828	39.63	49.29	66.2	358.05	229.65	176.3	2.310977601	0.355672072	6.497495249	8.17E-11	3.61E-08
Gm32263	28.87110451	7	7	11	52	48	28	2.383153586	0.508015822	4.691101112	2.72E-06	0.000221411
Gm34156	20.76371786	9	10	12	74	44	30	2.265513343	0.542479997	4.176215443	2.96E-05	0.001336896
Gm36043	22.39368309	6	5	8	44	47	18	2.592474169	0.54942622	4.718511923	2.38E-06	0.000197455
Gm36430	33.70116116	8.58	14.07	11	89.63	77.13	43.86	2.654561341	0.444969772	5.965711618	2.44E-09	7.06E-07
Gm36482	20.71544278	25	34	30	0	4	2	-3.83454363	0.741236461	-5.173171896	2.30E-07	3.06E-05
Gm38679	9.765808857	5	23	11	1	2	0	-3.695084162	1.120624421	-3.297343957	0.000976039	0.015677193
Gm40863	46.56114494	11	29	20	129	98	51	2.204583022	0.580300868	3.79903451	0.000145261	0.004102807
Gm40996	7.552265108	1	3	3	17	11	11	2.50677559	0.78175786	3.20658828	0.001343191	0.019807304
Gm41348	16.34506371	1	2	0	47.98	35.96	11	4.986263686	1.154009499	4.320816847	1.55E-05	0.000827879
Gm4151	14.75417782	8	5	6	45	29	29	2.108275513	0.664545596	3.172506935	0.001511289	0.021376888
Gm51741	63.94110977	16	46	26	190	137	67	2.14870224	0.534397039	4.020797431	5.80E-05	0.002149809
Gm51911	10.56499502	1	1.33	1.67	31	27	10	4.097892873	0.982499275	4.170886409	3.03E-05	0.001351314
Gm51911_1	10.56499502	1	1.33	1.67	31	27	10	4.097892873	0.982499275	4.170886409	3.03E-05	0.001351314
Gm52670	269.5611353	111.02	190.43	129.73	898.38	559.95	287.43	2.004994408	0.564106489	3.554283539	0.00037901	0.008054426
Gm9909	15.27763996	7	7	5	26	21	24	2.008639724	0.511862245	3.92418027	8.70E-05	0.002812978
Gnb1l_1	9.062110801	0	0	0	32.08	15.93	23.79	7.065075574	1.580322246	4.470655015	7.80E-06	0.000473805
Gzmc	15.44362302	7	1	2	25	17	9	2.398448011	0.75784687	3.164818786	0.001551796	0.021689564
H2-Q5_1	15.03682403	2.36	5.89	7.31	30.23	23.14	13.76	2.169957832	0.622224141	3.487421475	0.000487702	0.009477826
Hba-a2	387.93373	81.49	175.57	83.86	290.51	667.99	407.49	2.050377263	0.714390052	2.870108923	0.004103304	0.041362898
Hmgcs2	801.4831013	2902	805	1535	410	231	265	-2.460982211	0.740907544	-3.321578019	0.0008951	0.014804729
Ifi204	327.5294082	126.11	59.05	80.23	1015.44	555.27	575.28	3.086399238	0.655634471	4.70749995	2.51E-06	0.000206766
Ifi44	1116.508413	101	70	139	4543	2199	2715	4.947160704	0.865139778	5.718336887	1.08E-08	2.47E-06
Ifit1	7673.556513	1769.99	2024.23	3935.94	21824.94	13146.57	10261.91	2.545436933	0.715034369	3.559880538	0.000371024	0.007940764
Ifit1bl1	21549.2156	9304	5540	8510.04	62626	38723.85	30192	2.534676144	0.549883171	4.609481212	4.04E-06	0.000285322
Ifit2	2497.253485	302	194	361	10845	5970	4400	4.677194643	0.695453928	6.725383889	1.75E-11	9.99E-09
Ifit3	3166.64499	549.61	431.87	750.65	10985.54	7056.37	5226.65	3.759269065	0.72653204	5.174264665	2.29E-07	3.06E-05
Ifit3b	624.1982694	120.39	153.13	145.35	2032.46	1442.63	1091.35	3.484205554	0.386001352	9.026407649	1.77E-19	7.84E-16
Igtp	941.7706085	200.7	178.5	293.74	2784.28	2061.3	1361.67	3.218495309	0.623738423	5.160008093	2.47E-07	3.19E-05
Igtp_1	941.7706085	200.7	178.5	293.74	2784.28	2061.3	1361.67	3.218495309	0.623738423	5.160008093	2.47E-07	3.19E-05
Irgm1	2704.064115	1333	964.48	1406	7253	4308	4243.89	2.134228837	0.499556598	4.272246321	1.94E-05	0.000969268
Irgm2	1239.357078	474.59	384	636.51	3032.51	2255.4	1432.42	2.182447282	0.519228545	4.20324981	2.63E-05	0.001217813
Klkb1	51.10797208	26	101	51	9	19	14	-2.044901124	0.684795246	-2.986149708	0.002825143	0.032205901
Krt13	9.583954699	6	5	1	17	27	16	2.291852522	0.770157951	2.975821414	0.00292205	0.032782208
Lct	2260.347596	314	2426	1742	18	62	79	-4.747509724	1.501796528	-3.161220335	0.001571096	0.021855664
Lgals3bp	19836.96665	6855	7330	11094	45891	36021	22577	2.056411589	0.319230764	6.44177134	1.18E-10	5.09E-08
LOC115489411	10.56499502	1	1.33	1.67	31	27	10	4.097892873	0.982499275	4.170886409	3.03E-05	0.001351314
Ly6a	7753.223192	1997	834	1352	23467	15457	11842	3.648453319	0.685481989	5.322464158	1.02E-07	1.60E-05
Ly6d	5384.622771	2381	961	1027	8428	9206	7464	2.611047472	0.672365934	3.883372639	0.000103018	0.003179674
Ly6e	9415.925298	3457	2803	4421	21080	17081	10512	2.210801328	0.250110986	8.83928116	9.63E-19	3.41E-15
Ly6g	10.32811402	2	0	3	45	5	3	3.316132446	1.163775403	2.849460846	0.00437934	0.043089095
Mx2	565.1954975	117.26	135	189.43	2040	1076.48	871.45	3.174544093	0.563364355	5.63497507	1.75E-08	3.60E-06
Nlrc5	836.8536416	155	207	307	2779	1700	1317	3.103938429	0.312375596	9.936558655	2.89E-23	2.55E-19
Oas1a	6549.794025	2037.46	1938.02	3051.78	16559.65	11139.54	10433.2	2.466148135	0.543308906	4.539127017	5.65E-06	0.000368545
Oas1b	301.0534673	51	77	123	874	573	404	2.878412008	0.368570206	7.809670884	5.73E-15	7.24E-12
Oas1g	3439.002411	1026.54	1038.98	1472.22	9073.35	5686.46	5453.8	2.535448997	0.546128689	4.642585252	3.44E-06	0.00025778
Oas1h	12.36100331	1	4	7	28	33	13	2.737699557	0.721075041	3.796691607	0.00014664	0.004135155
Oas2	2853.327773	174	197	487	11948	6013	4685	4.701830669	0.893701967	5.261072309	1.43E-07	2.14E-05
Oas3	3055.311212	368	488	1105	9519	6275	4893	3.390166116	0.751177707	4.51313462	6.39E-06	0.000406259
Oasl1	10383.10302	4489	4370	5537	26697	18968	13788	2.064734582	0.301940418	6.838218605	8.02E-12	4.89E-09
Oasl2	10706.15099	2481	2390	4935	29554	19637	15991	2.753225309	0.643430073	4.278981391	1.88E-05	0.000943073
Olfr658	8.415226058	1	0	4	31	17.34	12	3.582072286	1.172898996	3.054033039	0.002257872	0.027819817
Osm	21.12067973	2	2	9	8	26	17	2.033255346	0.659527951	3.082894881	0.002049976	0.025963909
Oxct2b	14.94585578	3.55	6.84	6.12	37.73	30.4	20.65	2.412103474	0.599633636	4.022628704	5.76E-05	0.002142274
Phf11a	22.94600992	6	6	9	70.19	28	53	2.838568069	0.540041055	5.25620792	1.47E-07	2.17E-05
Phf11b	192.8588299	45.17	39	63.26	504.53	292.58	325.54	2.940786907	0.260734459	11.27885788	1.67E-29	2.95E-25
Phf11d	184.2955284	71.21	56.92	63.85	650.12	291.39	322.3	2.740460606	0.421084724	6.50809789	7.61E-11	3.45E-08
Pla2g2e	55.67982333	20	10	13	111	121	77	2.887448403	0.50876395	5.67541864	1.38E-08	3.08E-06
Pla2g4c	1512.550495	236	220	211	2438	263	917	2.515508191	0.779609569	3.226625599	0.001252592	0.018784637
Plaur	847.3222401	396	298	408	1542	1907	873	2.001709811	0.483344109	4.141376245	3.45E-05	0.001460282
Prl2c2	12.4186299	1.91	3	7	12	21	21.89	2.257677361	0.757410204	2.98078551	0.002875101	0.032544596
Prrg4	68.72114254	27	26	20	110	98	98	2.131215839	0.379669415	5.61334613	1.98E-08	4.03E-06
Rnf213	24230.90703	8670.84	9669.98	14312.83	66767.35	45996.58	28335.8	2.112273562	0.446549934	4.730206863	2.24E-06	0.000190658
Rnf225	39.76949139	17	18	17	100	87	68	2.334335952	0.340085469	6.863968518	6.70E-12	4.23E-09
Rsad2	4149.806244	351	548	900	15685	10569	6079	4.151418804	0.81082315	5.120005273	3.06E-07	3.73E-05
Rtp4	1664.172243	362	339	773	4425	2572	2512	2.723971344	0.606323908	4.492600914	7.04E-06	0.000434968
S100g	301.1555649	880	432	495	86	74	78	-2.847256374	0.3411143	-8.346927616	7.01E-17	1.75E-13
Serpina1f	27.61659287	21	44.91	46	3	13	8	-2.157708578	0.720816496	-2.99342286	0.002758672	0.031817408
Slc17a3	10.33391992	17	21	14	4	5	2	-2.163539943	0.687180181	-3.148431813	0.00164149	0.022481167
Slc6a20b	47.16027463	57.75	119.29	78.26	15.4	9.33	13.43	-2.754491074	0.49227864	-5.595390197	2.20E-08	4.32E-06
Slfn1	48.8764304	8.33	10	14	117	97.33	67	3.160165778	0.424212946	7.449479812	9.37E-14	7.89E-11
Slfn1_2	48.8764304	8.33	10	14	117	97.33	67	3.160165778	0.424212946	7.449479812	9.37E-14	7.89E-11
Slfn1_3	48.8764304	8.33	10	14	117	97.33	67	3.160165778	0.424212946	7.449479812	9.37E-14	7.89E-11
Slfn10-ps_3	58.87972763	29.32	22.5	8.08	85.46	143.85	87.45	2.488938399	0.417109794	5.967106108	2.41E-09	7.06E-07
Slfn2	2111.806324	853	450.48	824.06	4904.74	3716.25	3182.55	2.517398718	0.302633822	8.318299332	8.92E-17	1.75E-13
Slfn4	16860.8129	1941	2248	3409	65720.3	40209.56	26448.95	4.109975629	0.553039986	7.43160664	1.07E-13	8.62E-11
Slfn5	1425.683227	290.52	207.69	317.95	5195.26	3185.18	2242.34	3.716825926	0.692316237	5.368682296	7.93E-08	1.30E-05
Slfn5_1	18.62072986	2.71	1.43	6.16	68.27	33.79	29.98	3.736467951	0.722804441	5.169403701	2.35E-07	3.10E-05
Slfn5_2	68.87223368	16.77	9.63	16.88	229.94	164.44	104.58	3.528736003	0.583382595	6.048750911	1.46E-09	4.53E-07
Slfn5_3	10.41455539	0	3.25	0	31.52	25.59	25.1	4.817824188	1.172220662	4.109997669	3.96E-05	0.00161938
Sp100	1909.293561	515.25	593.08	951.43	4023.38	2827.87	2457.57	2.189301583	0.274308557	7.981164003	1.45E-15	2.56E-12
Spats2l	2213.06114	1049	925	1131	5592	3876	2936	2.033669885	0.311831999	6.521684402	6.95E-11	3.32E-08
Sprr2i	17.67821391	8	2	0	33	29	15	3.022749054	0.908523174	3.327101762	0.000877543	0.014596276
Stc1	42.76144708	20	13	12	89	37	98	2.395367154	0.583245677	4.106960834	4.01E-05	0.001626445
Tap1	1631.9014	670.5	600.64	834	3999	3110.5	1807.69	2.096575982	0.269622519	7.775967648	7.49E-15	8.27E-12
Tap1_1	1631.9014	670.5	600.64	834	3999	3110.5	1807.69	2.096575982	0.269622519	7.775967648	7.49E-15	8.27E-12
Trim30a	2365.983953	383.61	303.47	708.09	7185.99	4148.6	4094.96	3.482994716	0.648801383	5.36835279	7.95E-08	1.30E-05
Trim30b	59.03302035	6.97	14.01	31.34	82.01	86.6	75.89	2.264326112	0.468091007	4.837362992	1.32E-06	0.000121164
Trim30c	45.60531165	8	4	10	95	82	68	3.800459906	0.456460975	8.32592513	8.37E-17	1.75E-13
Usp18	2471.842172	207	205	456	8431	5741	4221	4.407540654	0.837915597	5.26012485	1.44E-07	2.14E-05
Vwa1	385.6618911	378	479	459	83	81	91	-2.196809355	0.639999002	-3.432519969	0.000598	0.011094685
Xaf1	1359.523082	247	333	512	4018	2214	2115	3.092721067	0.568636944	5.438832454	5.36E-08	9.39E-06
Zbp1	3695.650853	1498	884	1560	9232	6503	5575	2.369812911	0.558539962	4.242870824	2.21E-05	0.001063165
