# Supplementary material for: Dual Transcriptomics To Determine Gamma Interferon-Independent Host Response to Intestinal Cryptosporidium parvum Infection
Source: Infect Immun. 2022 Feb 17;90(2):e00638-21. doi: 10.1128/iai.00638-21 (PMC8852703; doi:10.1128/iai.00638-21)
Supplement: Supplemental file 9 — Supplemental material. Download iai.00638-21-s0009.csv, CSV file, 0.002 MB [file iai.00638-21-s0009.csv]

Gene_ID	baseMean	F13-CECUM_S1-Uninfected-PBS	F14-CECUM_S3-Uninfected-PBS	F15-CECUM_S5-Uninfected-PBS	F22-CECUM_S19-Infected-PBS	F23-CECUM_S21-Infected-PBS	F24-CECUM_S23-Infected-PBS	log2FoldChange	lfcSE	stat	pvalue	padj
2210407C18Rik	621.4593013	1211	749	1762	312	212	114	-2.437987063	0.560185445	-4.352107117	1.35E-05	0.020177344
Cd177	1480.470037	754	561	528	1561	1751	2937	2.016445437	0.481904519	4.184325647	2.86E-05	0.028684663
Cyp3a25	48.65194719	228.97	23	119	3	3	3	-5.114975323	1.198840835	-4.266600848	1.98E-05	0.023567069
Gm33901	219.1333919	47	164	42	329	322.61	587.6	2.563646765	0.628932966	4.076184431	4.58E-05	0.035546963
Gsdmcl-ps	497.3830522	212.99	440	183.88	693.02	1547	772	2.01003104	0.483752659	4.155080085	3.25E-05	0.028684663
Krt13	55.16643753	13	1	9	52	324	107	4.438750575	0.893389871	4.9684362	6.75E-07	0.006812945
Lct	57.38504356	696	12	33	9	8	5	-4.842047779	1.080361252	-4.481878419	7.40E-06	0.018671097
Mcpt1	2137.876235	585	1314	364	3510	2927	1724	2.024283721	0.485434556	4.170044544	3.05E-05	0.028684663
Mcpt4	49.47268483	14	19	9	81	114	48	2.674046227	0.61536516	4.345462504	1.39E-05	0.020177344
Olfr165	21.38887737	57	12	63	5	4	2	-3.506207857	0.771465218	-4.544868354	5.50E-06	0.018495438
Pla2g4c	1902.289995	216	475	271	1919	11709	3737	4.388955472	0.868958427	5.0508233	4.40E-07	0.006812945
Pla2g5	427.618114	98	147	71	411	542	669	2.594327077	0.600100547	4.323153993	1.54E-05	0.020701353
Prss27	319.0857044	95	100	59	264	388	506	2.425011203	0.60212695	4.027408513	5.64E-05	0.039258699
Scn3b	372.5269589	76	242	50	412	420	1104	2.697370378	0.620944888	4.343977106	1.40E-05	0.020177344
Sec1	98.7668442	45.1	32.07	8.04	109.4	128.59	174.76	2.632687551	0.660332381	3.986912694	6.69E-05	0.045045245
Slc5a9	1622.387342	618	589	329	1542	1813	4291	2.593226158	0.576279782	4.499942979	6.80E-06	0.018671097
